# Supplementary material for: Spongy nitrogen-doped activated carbonaceous hybrid derived from biomass material/graphene oxide for supercapacitor electrodes
Source: Royal Society of Chemistry journal article supplement (doi:10.1039/c5ra01525a), 2015-01-01
Supplement: c5ra01525a1.pdf [file c5ra01525a1.pdf]

**Supporting Information for**

**Spongy Nitrogen-Doped Activated Carbonaceous**

**Hybrid Derived from Biomass Material/Graphene**

**Oxide for Supercapacitor Electrodes**

*Samira Gharehkhani,<sup>\*,†</sup> Seyed Farid Seyed Shirazi,<sup>\*,‡</sup> Siamak Pilban Jahromi,<sup>§</sup> Mehran*

*Sookhakian,<sup>§</sup> Saeid Baradaran,<sup>†</sup> Hooman Yarmand,<sup>†</sup> Azim Ataollahi Oshkour,<sup>†</sup> Salim Newaz*

*Kazi,<sup>†</sup> Wan Jeffrey Basirun<sup>||,#</sup>*

<sup>†</sup> Department of Mechanical Engineering, Faculty of Engineering, University of Malaya, 50603 Kuala Lumpur, Malaysia

<sup>‡</sup> Department of Mechanical Engineering and Advanced Material Research Center, University of Malaya, 50603, Kuala Lumpur, Malaysia

<sup>§</sup> Low Dimensional Materials Research Center, Department of Physics, Faculty of Science, University of Malaya, 50603, Kuala Lumpur, Malaysia

<sup>||</sup> Institute of Nanotechnology & Catalysis Research (NanoCat), University of Malaya, 50603 Kuala Lumpur, Malaysia.

<sup>#</sup> Department of Chemistry, Faculty of Science, University of Malaya, 50603, Kuala Lumpur, Malaysia.

Corresponding author:

Samira Gharehkhani, Email: [s\\_gharahkhani\\_248@yahoo.com](mailto:s_gharahkhani_248@yahoo.com)

Seyed Farid Seyed Shirazi, Email: [f.shirazi@siswa.um.edu.my](mailto:f.shirazi@siswa.um.edu.my)

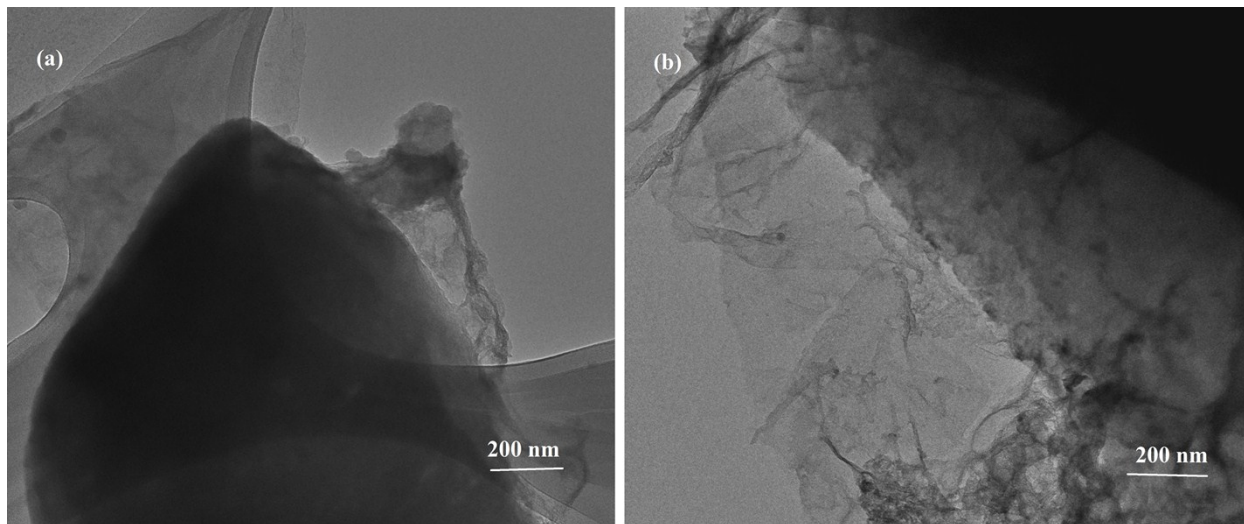

**Figure S1.** TEM images of (a) A-CRGO-1, (b) A-CRGO-4

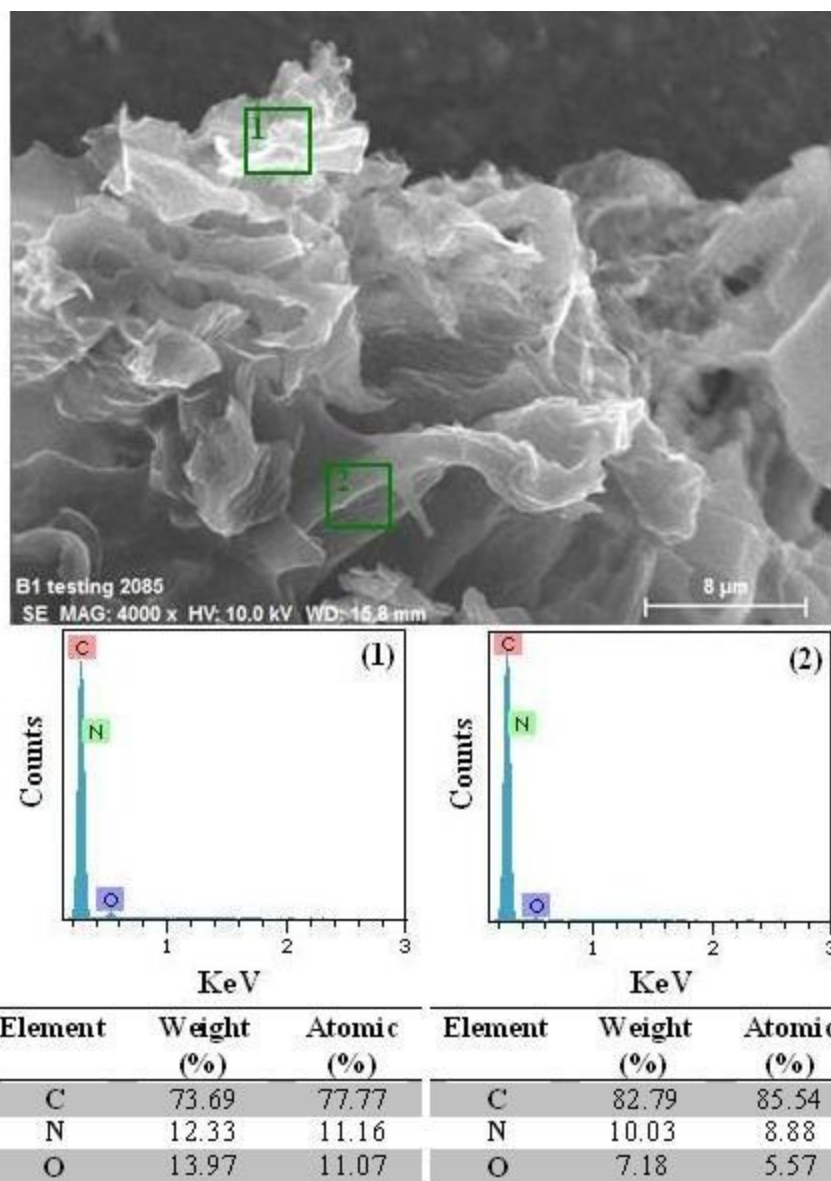

**Figure S2.** EDX analysis of NA-CRGO-1at two different zons; 1) Graphene 2) Carbon

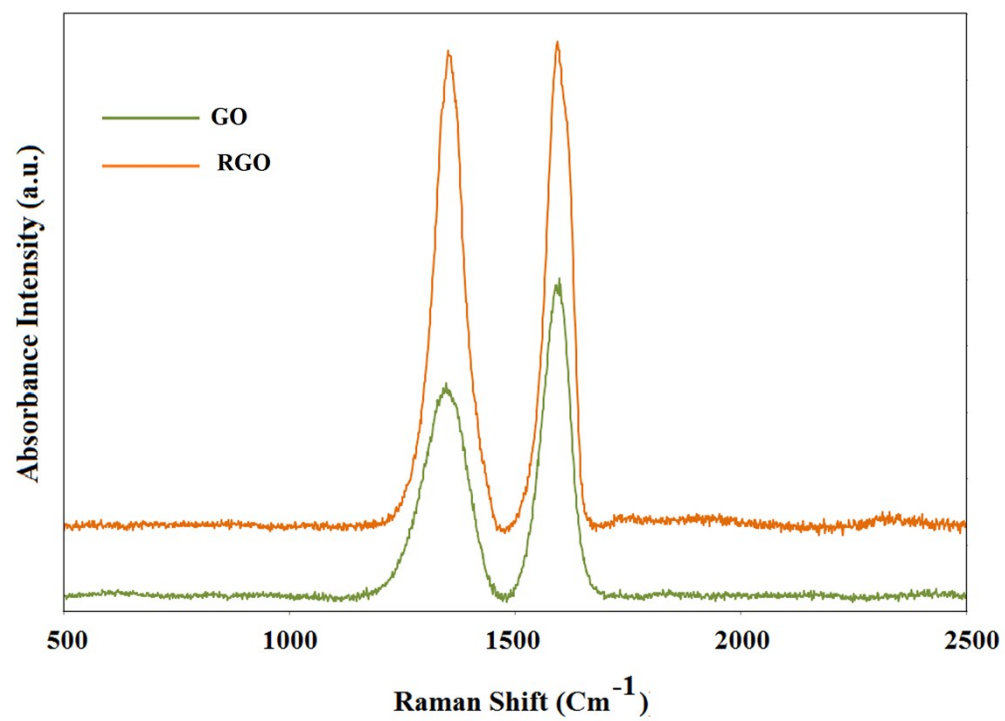

**Figure S3.** The Raman spectra of GO and RGO

**Table S1.** Carbon, hydrogen, oxygen and nitrogen contents (%) in AC, A-CRGO and NA-CRGO samples obtained using the elemental analysis (CHN)

| <b>Sample</b>    | <b>C</b> | <b>H</b> | <b>N</b> | <b>O</b> | <b>N/C</b> |
|------------------|----------|----------|----------|----------|------------|
| <b>AC</b>        | 57.950   | 2.321    | 0.243    | 39.486   | 0.0042     |
| <b>A-CRGO-1</b>  | 77.565   | 1.232    | 0.164    | 21.039   | 0.0021     |
| <b>A-CRGO-4</b>  | 63.331   | 2.006    | 0.290    | 34.373   | 0.0045     |
| <b>NA-CRGO-1</b> | 61.192   | 2.395    | 13.652   | 22.761   | 0.2231     |
| <b>NA-CRGO-4</b> | 59.218   | 2.625    | 10.215   | 27.942   | 0.1724     |

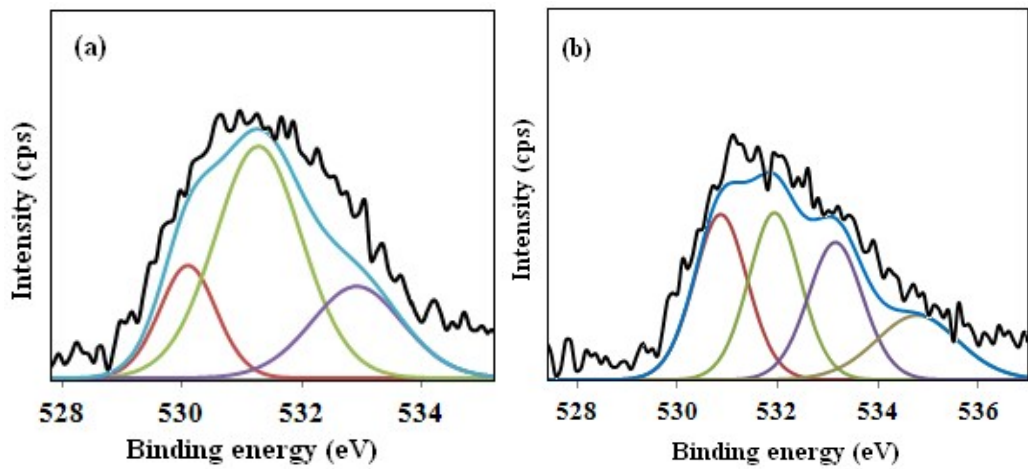

**Figure S4.** High-resolution O 1s spectra of a) NA-CRGO-1 and b) NA-CRGO-4
